# Supplementary material for: The social determinants of health within Belgian pharmacies: an exploratory qualitative study
Source: Research Square preprint supplement (doi:10.21203/rs.3.rs-7767744/v1), 2025-11-05
Supplement: Supplementary file 1 [file b05bafba731a7b89f0777035.docx]

# Domain 1: Research team and reflexivity

**Personal Characteristics**

1. Interviewer/facilitator: Which author/s conducted the interview or focus group?

First author, EODB, conducted all the interviews.

2. Credentials: What were the researcher’s credentials? E.g. PhD, MD

Master’s student in Pharmaceutical sciences at University of Antwerp.

3. Occupation: What was their occupation at the time of the study?

Student

4. Gender: Was the researcher male or female?

Female

5. Experience and training: What experience or training did the researcher have? Relationship with participants

The first author completed a pharmacy internship in Antwerp and was actively working as a student-pharmacist during the interviews.

6. Relationship established: Was a relationship established prior to study commencement?

No relationship was established.

7. Participant knowledge of the interviewer: What did the participants know about the researcher? e.g. personal goals, reasons for doing the research

Participants were informed that the interviews were conducted as part of the first author's Master’s thesis in Pharmaceutical Sciences.

8. Interviewer characteristics: What characteristics were reported about the interviewer/facilitator? e.g. Bias, assumptions, reasons and interests in the research topic

# The interviewer had previously completed an internship at a hospital pharmacy in a disadvantaged neighbourhood in Antwerp. This experience contributed to her interest in health inequalities among vulnerable populations and may have shaped her curiosity regarding how pharmacists perceive and address patients' social needs.

# Domain 2: study design

**Theoretical framework**

9. Methodological orientation and Theory: What methodological orientation was stated to underpin the study? e.g. grounded theory, discourse analysis, ethnography, phenomenology, content analysis

Thematic analysis was used to analyse the qualitative data.

**Participant selection**

10. Sampling How were participants selected? e.g. purposive, convenience, consecutive, snowball

Out of approximately 700 pharmacists contacted, 7 responded and agreed to be interviewed. These were mainly pharmacists from advantaged areas. Subsequently, 7 additional pharmacists working in known disadvantaged areas in Antwerp were purposively recruited via email or phone.

11. Method of approach: How were participants approached? e.g. face-to-face, telephone, mail, email

Both e-mail and telephone.

12. Sample size: How many participants were in the study?

14 pharmacists participated in the study.

13. Non-participation How many people refused to participate or dropped out? Reasons?

Of the 700 pharmacists contacted, only 7 responded; no reasons for non-participation were obtained.

**Setting**

14. Setting of data collection: Where was the data collected? e.g. home, clinic, workplace

Data were collected at the participants’ workplaces, specifically within the pharmacy premises, in a private and separate room to ensure confidentiality and minimize interruptions.

15. Presence of non-participants: Was anyone else present besides the participants and researchers?

No.

16. Description of sample: What are the important characteristics of the sample? e.g. demographic data, date

The sample included both male and female pharmacists, working in pharmacies located in both low-income and high-income neighborhoods.

**Data collection**

17. Interview guide: Were questions, prompts, guides provided by the authors? Was it pilot tested?

Yes, the interview guide was pilot-tested with a pharmacist who did not participate in the study.

18. Repeat interviews: Were repeat interviews carried out? If yes, how many?

No.

19. Audio/visual recording: Did the research use audio or visual recording to collect the data?

Yes audio recordings were made during the interview.

20. Field notes: Were field notes made during and/or after the interview or focus group?

Audio reflections (voice notes) were recorded by the interviewer after the interviews to capture immediate impressions and experiences.

21. Duration: What was the duration of the interviews or focus group?

Approximately 40 minutes.

22. Data saturation: Was data saturation discussed?

Data collection continued until no new themes emerged, indicating data saturation had been achieved.

23. Transcripts returned: Were transcripts returned to participants for comment and/or correction?

No.

# Domain 3: analysis and findings

**Data analysis**

24. Number of data coders: How many data coders coded the data?

The first author was the only coder of the data. Additionally, three interviews were independently coded by a master's student involved in a separate qualitative study.

25. Description of the coding tree: Did authors provide a description of the coding tree?

No.

26. Derivation of themes: Were themes identified in advance or derived from the data?

Themes were inductively derived from the data.

27. Software: What software, if applicable, was used to manage the data?

Nvivo.

28. Participant checking: Did participants provide feedback on the findings?

After the defense of the master’s thesis, the manuscript was shared with participants via email.

**Reporting**

29. Quotations presented: Were participant quotations presented to illustrate the themes / findings? Was each quotation identified? e.g. participant number

Yes, findings were presented with quotations and quotations were identified.

30. Data and findings consistent: Was there consistency between the data presented and the findings?

Yes.

31. Clarity of major themes: Were major themes clearly presented in the findings?

Yes, they are illustrated in table 2.

32. Clarity of minor themes: Is there a description of diverse cases or discussion of minor themes?

Yes, they are illustrated in table 2.
